# Supplementary material
Source: publisher site journal article supplement (https://www.spandidos-publications.com/692/downloadSupplementary)

Figure S1. Transfection with SNAI1 siRNA significantly down-regulated SNAI1 protein level in HLEB-3 cells. Knockdown of SNAI1 was achieved by siRNA transfection. Non-transfected cells, cells with only transfection reagent and cells transfected with control siRNA were used as controls. The protein expression level of SNAI1 in HLEB-3 cells was determined by (A) western blot analysis and (B) semi-quantified by densitometry. siRNA, small interfering RNA; Con, control; SNAI1, Snail family transcriptional repressor 1. \*\*P<0.01.

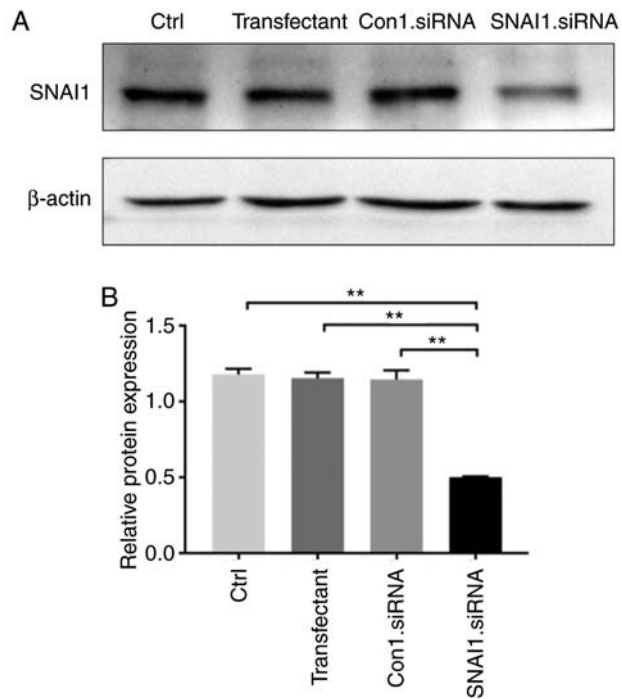

Supplement: Supplementary file 1 [file downloadSupplementary]
